# Supplementary material for: Metallothionein-like peptides involved in sequestration of Zn in the Zn-accumulating ectomycorrhizal fungusRussula atropurpurea
Source: Royal Society of Chemistry journal article supplement (doi:10.1039/c4mt00141a), 2014-01-01
Supplement: c4mt00141a1.pdf [file c4mt00141a1.pdf]

**Metallothionein-like peptides involved in sequestration of Zn  
in the Zn-accumulating ectomycorrhizal fungus *Russula atropurpurea***

Tereza Leonhardt, Jan Sácký, Pavel Šimek, Jiří Šantrůček and Pavel Kotrba

*Institute of Chemical Technology, Prague, Department of Biochemistry and Microbiology,  
Technická 3, 166 28 Prague, Czech Republic*

Author for correspondence: Pavel Kotrba, *E-mail: pavel.kotrba@vscht.cz*,  
*Tel: (+420) 220445134, Fax: (+420) 220445167*

**Electronic Supplementary Information:**

**Table S1** List of the sequences of carbamidomethylated RaZBP fragments identified by using the UHPLC/ESI-Q-TOF-MS/MS analysis

**Fig. S1** Electrophoretic analysis of recombinant RaZBP1 produced in *E. coli* BL21(DE3).

*The original mass spectrometry data have been deposited to the ProteomeXchange Consortium via the PRIDE partner repository (<http://www.ebi.ac.uk/pride>; dataset identifier PXD001073; DOI 10.6019/PXD001073).*

**Table S1** List of the sequences of carbamidomethylated RaZBP fragments identified by using the UHPLC/ESI-Q-TOF-MS/MS analysis as described in Materials and Methods.

| Precursor<br>( <i>m/z</i> ) | <i>z</i> | Theoretical<br>rel. MW | $\Delta m/z$<br>(ppm) | Mascot<br>score <sup>a</sup> | Sequence                                   | Position<br>in RaZBP | Carbamidomethyl<br>at position |
|-----------------------------|----------|------------------------|-----------------------|------------------------------|--------------------------------------------|----------------------|--------------------------------|
| RaZBP1                      |          |                        |                       |                              |                                            |                      |                                |
| 875.9488                    | 5        | 4374.7127              | -1.15                 | 87.13                        | NGGEGEGKGPCTAQGCQCPAFTGNGSYCSRGGCGHGYNQHSG | 12-53                | 11, 16, 18, 28, 33             |
| 853.1420                    | 5        | 4260.6698              | 0.88                  | 93.94                        | GGEGEGKGPCTAQGCQCPAFTGNGSYCSRGGCGHGYNQHSG  | 13-53                | 10, 15, 17, 27, 32             |
| 830.3319                    | 5        | 4146.6268              | -0.91                 | 44.95                        | EGEGKGPCTAQGCQCPAFTGNGSYCSRGGCGHGYNQHSG    | 15-53                | 8, 13, 15, 25, 30              |
| 804.5217                    | 5        | 4017.5843              | -3.08                 | 50.67                        | GEGKGPCTAQGCQCPAFTGNGSYCSRGGCGHGYNQHSG     | 16-53                | 7, 12, 14, 24, 29              |
| 958.8863                    | 4        | 3831.5202              | -1.05                 | 72.25                        | GKGPCTAQGCQCPAFTGNGSYCSRGGCGHGYNQHSG       | 18-53                | 5, 10, 12, 22, 27              |
| 744.7908                    | 4        | 2975.1341              | 0.02                  | 49.71                        | CQCPAFTGNGSYCSRGGCGHGYNQHSG                | 27-53                | 1, 3, 13, 18                   |
| RaZBP2                      |          |                        |                       |                              |                                            |                      |                                |
| 864.5485                    | 5        | 4317.7025              | 0.84                  | 85.89                        | GGGEGGRGACTVSGCQCPGFTGNYANCARQGCGHGYNQHSD  | 13-53                | 10, 15, 17, 27, 32             |
| 841.7404                    | 5        | 4203.6595              | 1.41                  | 61.05                        | GGEGRGACTVSGCQCPGFTGNYANCARQGCGHGYNQHSD    | 15-53                | 8, 13, 15, 25, 30              |
| 752.7100                    | 5        | 3758.5151              | -0.33                 | 48.28                        | GRGACTVSGCQCPGFTGNYANCARQGCGHGYNQHS        | 18-51                | 5, 10, 12, 22, 27              |
| 991.1526                    | 4        | 3960.5740              | 1.81                  | 113.00                       | GRGACTVSGCQCPGFTGNYANCARQGCGHGYNQHSD       | 18-53                | 5, 10, 12, 22, 27              |
| 667.7761                    | 4        | 2667.0728              | 0.98                  | 67.75                        | PGFTGNYANCARQGCGHGYNQHSD                   | 30-53                | 10, 15                         |
| 838.6725                    | 3        | 2512.9985              | -1.20                 | 61.93                        | FTGNYANCARQGCGHGYNQHSD                     | 32-53                | 8, 13                          |

<sup>a</sup> Cut-off score for the 5% confidence threshold was calculated by Mascot as 43.

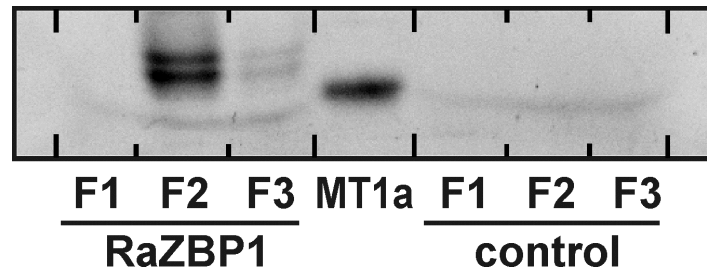

**Fig. S1** Electrophoretic analysis of recombinant RaZBP1 produced in *E. coli* BL21(DE3). The 4-h expression of RaZBP1 under the control of T7 promoter of pET-29b (Novagen) was initiated with IPTG, and the harvested cells were disintegrated by sonication in the presence of 1 mM DTT. A partially purified peptide was obtained from the cell-free extract in which proteins were heat-precipitated and metals removed after acidification with TFA (pH 1.05) by desalting on a PD-10 column (GE Healthcare) packed with Sephadex G-25. The aliquots of eluted 0.5 ml F1, 3 ml F2 and 1 ml F3 fractions and the 6.1-kDa rabbit MT1a were labeled with SBD-F. The same treatment was used to obtain the control preparation from the extracts of *E. coli* cells that were not transformed with RaZBP1.
